# Supplementary material for: The origins and consequences of UPF1 variants in pancreatic adenosquamous carcinoma
Source: eLife. 2021 Jan 6;10:e62209. doi: 10.7554/eLife.62209 (PMC7846273; doi:10.7554/eLife.62209)
Supplement: Figure 1—source data 1. [file elife-62209-fig1-data1.xlsx]

## Sheet: Figure 1—source data 1
Figure 1—source data 1. Source data for mouse tumor volume (Figure 1C).
Average tumor volume for Cas9 control mice
Time (days)	Number of animals	Average tumor volume	Standard error
13	9	144.7	36.5434
22	10	282.658	45.8873
29	10	488.879	56.751
36	8	1264.92	188.55
43	3	2225.28	625.308
Average tumor volume of Upf1-mutant mice
Time (days)	Number of animals	Average tumor volume	Standard error
13	9	158.7	24.1226
22	10	324.068	45.9572
29	10	625.134	74.009
36	9	1562.41	252.997
43	4	2765.35	248.672
