# Supplementary material for: The origins and consequences of UPF1 variants in pancreatic adenosquamous carcinoma
Source: eLife. 2021 Jan 6;10:e62209. doi: 10.7554/eLife.62209 (PMC7846273; doi:10.7554/eLife.62209)
Supplement: Figure 1—source data 2. [file elife-62209-fig1-data2.xlsx]

## Sheet: Figure 1—source data 2
Figure 1—source data 2. Source data for mouse survival (Figure 1D).
Cas9 control mouse identifier	Date	Days alive
rk286	2017-06-26	48
rk287	2017-06-18	40
rk288	2017-06-19	41
rk289	2017-06-13	35
rk290	2017-06-26	48
rk291	2017-06-29	51
rk292	2017-06-19	41
rk293	2017-06-12	34
rk294	2017-06-19	41
rk295	2017-06-18	40
Upf1-mutant mouse identifier	Date	Days alive
rk276	2017-06-29	51
rk277	2017-06-19	41
rk278	2017-06-19	41
rk279	2017-06-26	48
rk280	2017-06-18	40
rk281	2017-06-20	42
rk282	2017-06-12	34
rk283	2017-06-26	48
rk284	2017-06-19	41
rk285	2017-06-26	48
