# Supplementary material for: The origins and consequences of UPF1 variants in pancreatic adenosquamous carcinoma
Source: eLife. 2021 Jan 6;10:e62209. doi: 10.7554/eLife.62209 (PMC7846273; doi:10.7554/eLife.62209)
Supplement: Figure 2—source data 1. [file elife-62209-fig2-data1.xlsx]

## Sheet: Figure 2—source data 1
Figure 2—source data 1. Source data for qPCR in HEK 293T cell lines (Figure 2A).
Replicate	Gene	Cт	Reporter	Cell line	Median Cт		Replicate	Cell line	ΔCт (Full-length reporter)	ΔCт (PTC39 (NMD-sensitive) reporter)	ΔΔCт
1	HBB	17.144	Full-length	WT control (PAM mutation)	17.185		1	WT control (PAM mutation)	-2.31233	-0.790667	-1.52167
1	HBB	17.185	Full-length	WT control (PAM mutation)	17.185		2	WT control (PAM mutation)	-3.366	-2.59133	-0.774667
1	HBB	17.35	Full-length	WT control (PAM mutation)	17.185		3	WT control (PAM mutation)	-3.06233	-2.35267	-0.709667
1	pMUP	19.424	Full-length	WT control (PAM mutation)	19.424		1	Patient 1	-1.85067	-0.433	-1.41767
1	pMUP	19.404	Full-length	WT control (PAM mutation)	19.424		2	Patient 1	-3.43667	-2.18733	-1.24933
1	pMUP	19.788	Full-length	WT control (PAM mutation)	19.424		3	Patient 1	-3.67933	-1.921	-1.75833
1	HBB	17.69	PTC39 (NMD-sensitive)	WT control (PAM mutation)	17.724		1	Patient 9	-3.0715	-1.4	-1.6715
1	HBB	17.724	PTC39 (NMD-sensitive)	WT control (PAM mutation)	17.724		2	Patient 9	-4.03533	-2.549	-1.48633
1	HBB	17.852	PTC39 (NMD-sensitive)	WT control (PAM mutation)	17.724		3	Patient 9	-3.678	-2.25933	-1.41867
1	pMUP	18.674	PTC39 (NMD-sensitive)	WT control (PAM mutation)	18.56
1	pMUP	18.56	PTC39 (NMD-sensitive)	WT control (PAM mutation)	18.56
1	pMUP	18.404	PTC39 (NMD-sensitive)	WT control (PAM mutation)	18.56
1	HBB	16.289	Full-length	Patient 1	16.175
1	HBB	16.036	Full-length	Patient 1	16.175
1	HBB	16.175	Full-length	Patient 1	16.175
1	pMUP	17.914	Full-length	Patient 1	17.914
1	pMUP	17.872	Full-length	Patient 1	17.914
1	pMUP	18.266	Full-length	Patient 1	17.914
1	HBB	17.956	PTC39 (NMD-sensitive)	Patient 1	17.928
1	HBB	17.928	PTC39 (NMD-sensitive)	Patient 1	17.928
1	HBB	17.744	PTC39 (NMD-sensitive)	Patient 1	17.928
1	pMUP	18.276	PTC39 (NMD-sensitive)	Patient 1	18.342
1	pMUP	18.342	PTC39 (NMD-sensitive)	Patient 1	18.342
1	HBB	16.775	Full-length	Patient 9	16.775
1	HBB	16.622	Full-length	Patient 9	16.775
1	HBB	16.937	Full-length	Patient 9	16.775
1	pMUP	19.715	Full-length	Patient 9	19.8495
1	pMUP	19.984	Full-length	Patient 9	19.8495
1	HBB	18.665	PTC39 (NMD-sensitive)	Patient 9	18.677
1	HBB	18.754	PTC39 (NMD-sensitive)	Patient 9	18.677
1	HBB	18.677	PTC39 (NMD-sensitive)	Patient 9	18.677
1	pMUP	20.03	PTC39 (NMD-sensitive)	Patient 9	20.03
1	pMUP	19.887	PTC39 (NMD-sensitive)	Patient 9	20.03
1	pMUP	20.379	PTC39 (NMD-sensitive)	Patient 9	20.03
2	HBB	16.731	Full-length	WT control (PAM mutation)	16.765
2	HBB	16.765	Full-length	WT control (PAM mutation)	16.765
2	HBB	16.862	Full-length	WT control (PAM mutation)	16.765
2	pMUP	20.099	Full-length	WT control (PAM mutation)	20.152
2	pMUP	20.152	Full-length	WT control (PAM mutation)	20.152
2	pMUP	20.205	Full-length	WT control (PAM mutation)	20.152
2	HBB	17.794	PTC39 (NMD-sensitive)	WT control (PAM mutation)	17.782
2	HBB	17.782	PTC39 (NMD-sensitive)	WT control (PAM mutation)	17.782
2	HBB	17.675	PTC39 (NMD-sensitive)	WT control (PAM mutation)	17.782
2	pMUP	20.311	PTC39 (NMD-sensitive)	WT control (PAM mutation)	20.311
2	pMUP	20.46	PTC39 (NMD-sensitive)	WT control (PAM mutation)	20.311
2	pMUP	20.254	PTC39 (NMD-sensitive)	WT control (PAM mutation)	20.311
2	HBB	15.945	Full-length	Patient 1	15.955
2	HBB	15.955	Full-length	Patient 1	15.955
2	HBB	16.037	Full-length	Patient 1	15.955
2	pMUP	19.436	Full-length	Patient 1	19.436
2	pMUP	19.588	Full-length	Patient 1	19.436
2	pMUP	19.223	Full-length	Patient 1	19.436
2	HBB	17.49	PTC39 (NMD-sensitive)	Patient 1	17.49
2	HBB	17.492	PTC39 (NMD-sensitive)	Patient 1	17.49
2	HBB	17.38	PTC39 (NMD-sensitive)	Patient 1	17.49
2	pMUP	19.682	PTC39 (NMD-sensitive)	Patient 1	19.682
2	pMUP	19.708	PTC39 (NMD-sensitive)	Patient 1	19.682
2	pMUP	19.534	PTC39 (NMD-sensitive)	Patient 1	19.682
2	HBB	16.45	Full-length	Patient 9	16.459
2	HBB	16.635	Full-length	Patient 9	16.459
2	HBB	16.459	Full-length	Patient 9	16.459
2	pMUP	20.483	Full-length	Patient 9	20.548
2	pMUP	20.548	Full-length	Patient 9	20.548
2	pMUP	20.619	Full-length	Patient 9	20.548
2	HBB	17.838	PTC39 (NMD-sensitive)	Patient 9	17.961
2	HBB	18.01	PTC39 (NMD-sensitive)	Patient 9	17.961
2	HBB	17.961	PTC39 (NMD-sensitive)	Patient 9	17.961
2	pMUP	20.531	PTC39 (NMD-sensitive)	Patient 9	20.505
2	pMUP	20.505	PTC39 (NMD-sensitive)	Patient 9	20.505
2	pMUP	20.42	PTC39 (NMD-sensitive)	Patient 9	20.505
3	HBB	17.27	Full-length	WT control (PAM mutation)	17.27
3	HBB	17.651	Full-length	WT control (PAM mutation)	17.27
3	HBB	17.206	Full-length	WT control (PAM mutation)	17.27
3	pMUP	20.242	Full-length	WT control (PAM mutation)	20.452
3	pMUP	20.62	Full-length	WT control (PAM mutation)	20.452
3	pMUP	20.452	Full-length	WT control (PAM mutation)	20.452
3	HBB	17.899	PTC39 (NMD-sensitive)	WT control (PAM mutation)	17.899
3	HBB	17.839	PTC39 (NMD-sensitive)	WT control (PAM mutation)	17.899
3	HBB	18.017	PTC39 (NMD-sensitive)	WT control (PAM mutation)	17.899
3	pMUP	20.4	PTC39 (NMD-sensitive)	WT control (PAM mutation)	20.301
3	pMUP	20.112	PTC39 (NMD-sensitive)	WT control (PAM mutation)	20.301
3	pMUP	20.301	PTC39 (NMD-sensitive)	WT control (PAM mutation)	20.301
3	HBB	16.307	Full-length	Patient 1	16.56
3	HBB	16.628	Full-length	Patient 1	16.56
3	HBB	16.56	Full-length	Patient 1	16.56
3	pMUP	20.613	Full-length	Patient 1	19.964
3	pMUP	19.956	Full-length	Patient 1	19.964
3	pMUP	19.964	Full-length	Patient 1	19.964
3	HBB	17.462	PTC39 (NMD-sensitive)	Patient 1	17.409
3	HBB	17.333	PTC39 (NMD-sensitive)	Patient 1	17.409
3	HBB	17.409	PTC39 (NMD-sensitive)	Patient 1	17.409
3	pMUP	19.284	PTC39 (NMD-sensitive)	Patient 1	19.297
3	pMUP	19.386	PTC39 (NMD-sensitive)	Patient 1	19.297
3	pMUP	19.297	PTC39 (NMD-sensitive)	Patient 1	19.297
3	HBB	16.896	Full-length	Patient 9	16.888
3	HBB	16.829	Full-length	Patient 9	16.888
3	HBB	16.888	Full-length	Patient 9	16.888
3	pMUP	20.518	Full-length	Patient 9	20.558
3	pMUP	20.558	Full-length	Patient 9	20.558
3	pMUP	20.571	Full-length	Patient 9	20.558
3	HBB	18.329	PTC39 (NMD-sensitive)	Patient 9	18.329
3	HBB	18.277	PTC39 (NMD-sensitive)	Patient 9	18.329
3	HBB	18.556	PTC39 (NMD-sensitive)	Patient 9	18.329
3	pMUP	20.348	PTC39 (NMD-sensitive)	Patient 9	20.613
3	pMUP	20.613	PTC39 (NMD-sensitive)	Patient 9	20.613
3	pMUP	20.979	PTC39 (NMD-sensitive)	Patient 9	20.613
