# Supplementary material for: The origins and consequences of UPF1 variants in pancreatic adenosquamous carcinoma
Source: eLife. 2021 Jan 6;10:e62209. doi: 10.7554/eLife.62209 (PMC7846273; doi:10.7554/eLife.62209)
Supplement: Figure 2—source data 2. [file elife-62209-fig2-data2.xlsx]

## Sheet: Figure 2—source data 2
Figure 2—source data 2. Source data for western blot in HEK 293T cell lines (Figure 2E).
Cell line	Replicate	UPF1 intensity	GAPDH intensity	UPF1 intensity normalized to GAPDH
WT control (PAM mutation)	1	13485.9	12112.4	1.1134
WT control (PAM mutation)	2	13941.3	14071.8	0.990723
WT control (PAM mutation)	3	32934.9	13573.1	2.42648
Patient 1	1	2037.57	11869.3	0.171666
Patient 1	2	7148.44	14017	0.509985
Patient 1	3	6606.27	12329	0.535834
Patient 9	1	6625.27	13556.3	0.488723
Patient 9	2	13183.1	10369.3	1.27136
Patient 9	3	12775.3	10331.1	1.23658
