# Supplementary material for: The origins and consequences of UPF1 variants in pancreatic adenosquamous carcinoma
Source: eLife. 2021 Jan 6;10:e62209. doi: 10.7554/eLife.62209 (PMC7846273; doi:10.7554/eLife.62209)
Supplement: Figure 2—source data 3. [file elife-62209-fig2-data3.xlsx]

## Sheet: Figure 2—source data 3
Figure 2—source data 3. Source data for RT-PCR in HEK 293T cell lines (Figure 2F).
Lane	Cell line	Replicate	Full-length band density	Skipped exon (ΔE10-11) band density	Percent skipped isoform
5	WT control (PAM mutation)	1	5.44336e+10	2.95904e+09	0.05 (visually undetectable)
6	WT control (PAM mutation)	2	5.80867e+10	3.24476e+09	0.05 (visually undetectable)
7	WT control (PAM mutation)	3	5.75082e+10	2.57245e+09	0.04 (visually undetectable)
8	WT control (PAM mutation)	4	5.65649e+10	3.65099e+09	0.06 (visually undetectable)
9	Patient 1	1	4.34499e+10	3.86636e+09	0.08 (visually undetectable)
10	Patient 1	2	4.7408e+10	3.56525e+09	0.07 (visually undetectable)
11	Patient 1	3	3.64065e+10	2.65958e+09	0.07 (visually undetectable)
12	Patient 1	4	3.6251e+10	2.4755e+09	0.06 (visually undetectable)
13	Patient 9	1	6.33407e+10	2.5218e+09	0.04 (visually undetectable)
14	Patient 9	2	6.15033e+10	3.1609e+09	0.05 (visually undetectable)
15	Patient 9	3	5.65765e+10	2.51927e+09	0.04 (visually undetectable)
16	Patient 9	4	5.74712e+10	2.49648e+09	0.04 (visually undetectable)
17	ΔE10-11 spike-in (10 fg)	1	5.03622e+10	6.32663e+10	0.56
18	ΔE10-11 spike-in (1 fg)	1	6.15653e+10	9.6783e+09	0.14
